# Supplementary material for: Adsorption and structural properties of ordered mesoporous carbons synthesized by soft-templating in the presence of boric acid and tetraethyl orthosilicate
Source: Royal Society of Chemistry journal article supplement (doi:10.1039/c2ra00920j), 2012-01-01
Supplement: c2ra00920j.pdf [file c2ra00920j.pdf]

## Adsorption and structural properties of ordered mesoporous carbons synthesized by soft-templating in the presence of boric acid and tetraethyl orthosilicate

Nilantha Wickramaratne and Mietek Jaroniec\*

Department of Chemistry, Kent State University, Kent, Ohio, 44242, USA

E-mail: [jaroniec@kent.edu](mailto:jaroniec@kent.edu)

**Table S1.** XPS elemental composition of the C-B-30-850 sample.

| Atomic % | Sample 1 | Sample 2 | Sample 3 | Sample 4 |
|----------|----------|----------|----------|----------|
| C1s      | 91.5     | 92.9     | 91.7     | 92.0     |
| O1s      | 7.0      | 5.9      | 6.5      | 6.6      |
| B1s      | 1.5      | 1.2      | 1.8      | 1.5      |

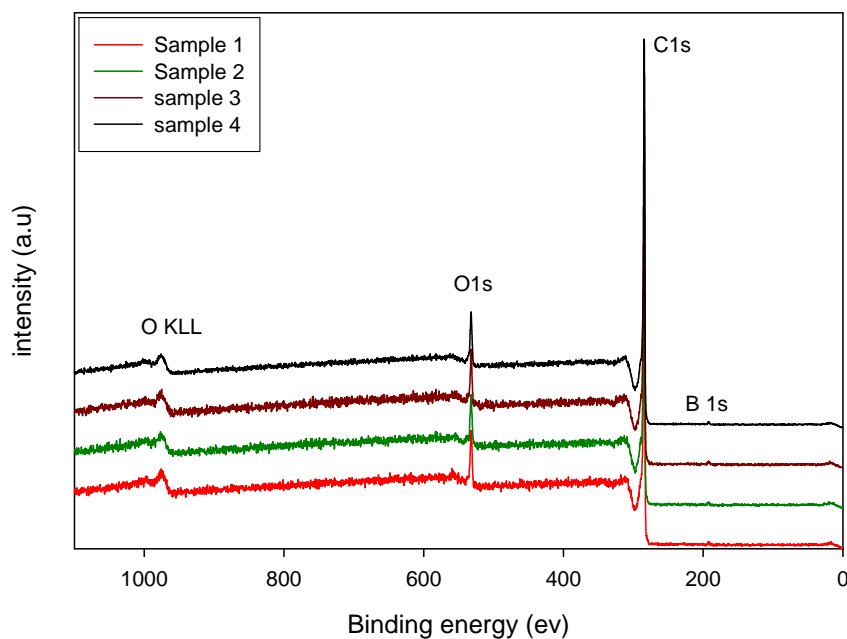

**Figure S1.** XPS spectra for different spots of the C-B-30-850 sample.

Electronic Supplementary Information (ESI) for RSC Advances  
© The Royal Society of Chemistry 2011

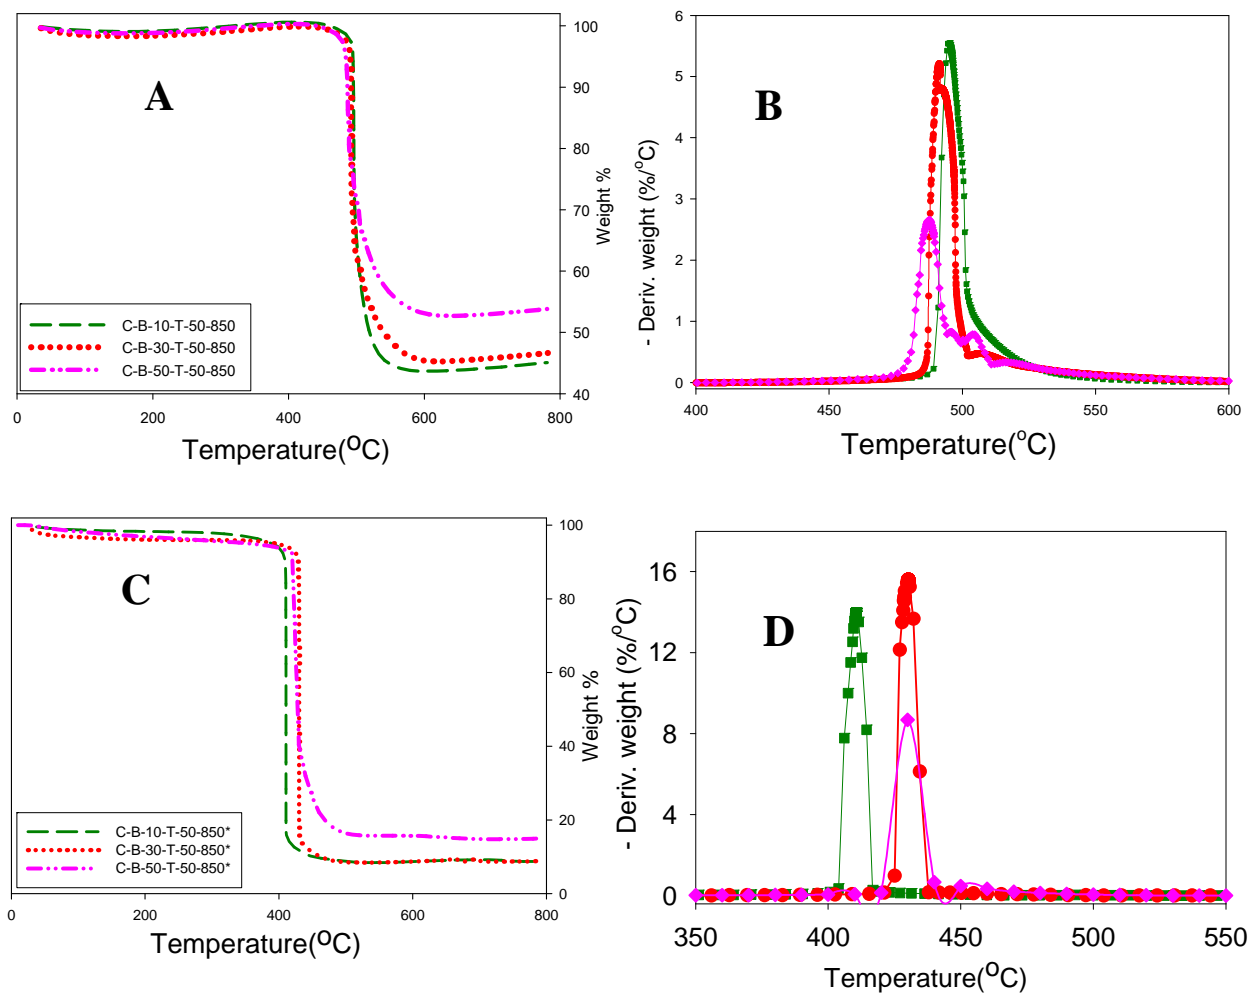

**Figure S2.** Weight change (TG) and differential (DTG) profiles of the B-containing mesoporous carbons prepared with and without TEOS addition before (A and B) and after (C and D) silica dissolution.

Electronic Supplementary Information (ESI) for RSC Advances  
© The Royal Society of Chemistry 2011

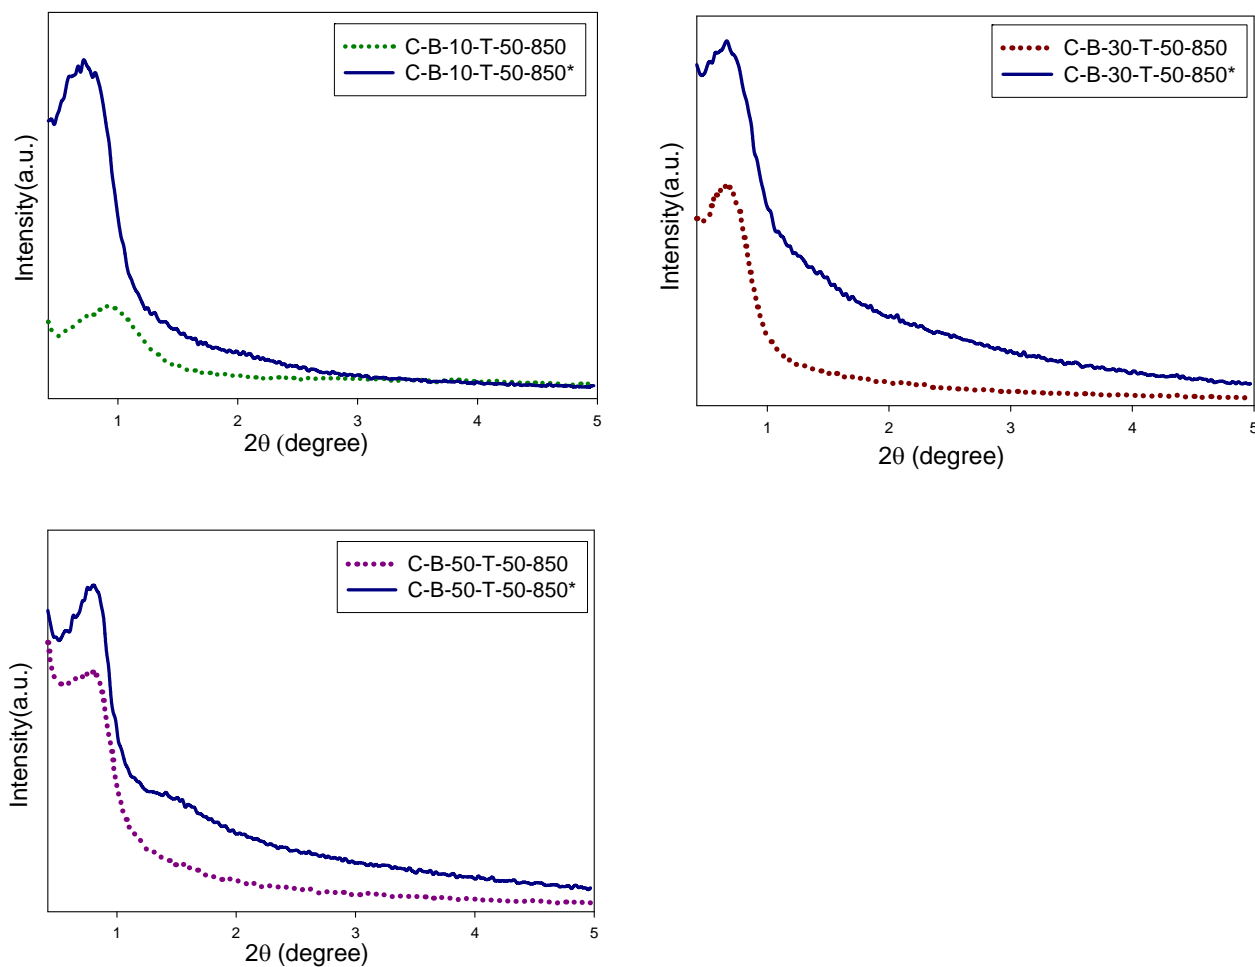

**Figure S3.** A comparison of the XRD patterns of the B-containing silica-carbon composites (prepared in the presence of TEOS) and the corresponding carbons (obtained from these composites by dissolution of silica; samples marked with \*) for 10 (panel A), 30 (panel B) and 50% (panel C) boric acid in the synthesis mixture.
